# Supplementary material for: Extracellular Vesicles Analysis in the COVID-19 Era: Insights on Serum Inactivation Protocols towards Downstream Isolation and Analysis
Source: PubMed Central journal article supplement (PMC8001372; doi:10.3390/cells10030544), 2021-03-04
Supplement: cells-10-00544-s001.pdf [file cells-10-00544-s001.pdf]

# Extracellular Vesicles Analysis in the COVID-19 Era: Insights on Serum Inactivation Protocols Towards Downstream Isolation and Analysis

Roberto Frigerio <sup>1,†</sup>, Angelo Musico <sup>1,†</sup>, Marco Brucale <sup>2,3</sup>, Andrea Ridolfi <sup>2,3</sup>, Silvia Galbiati <sup>4</sup>, Riccardo Vago <sup>4</sup>, Greta Bergamaschi <sup>1</sup>, Anna Maria Ferretti <sup>1</sup>, Marcella Chiari <sup>1</sup>, Francesco Valle <sup>2,3</sup>, Alessandro Gori <sup>1,\*;‡</sup> and Marina Cretich <sup>1,\*;‡</sup>

- <sup>1</sup> Istituto di Scienze e Tecnologie Chimiche “Giulio Natta” (SCITEC), Consiglio Nazionale delle Ricerche, Via Alfonso Corti 12, 20133 Milano, Italy; roberto.frigerio94@gmail.com (R.F.); angelo.musico94@gmail.com (A.M.); greta.bergamaschi@cnr.it (G.B.); anna.ferretti@cnr.it (A.F.); marcella.chiari@cnr.it (M.C.)
- <sup>2</sup> Istituto per lo Studio dei Materiali Nanostrutturati (ISMN), Consiglio Nazionale delle Ricerche, Via P. Gobetti 101, 40129 Bologna, Italy; marco.brucale@cnr.it (M.B.); andrea.ridolfi@ismn.cnr.it (A.R.); francesco.valle@cnr.it (F.V.)
- <sup>3</sup> Consorzio Interuniversitario per lo Sviluppo dei Sistemi a Grande Interfase (CSGI), Via della Lastruccia 3, 50019 Sesto Fiorentino, Firenze, Italy
- <sup>4</sup> IRCCS San Raffaele Scientific Institute, Via Olgettina 60, 20132 Milano, Italy; galbiati.silvia@hsr.it (S.G.); vago.riccardo@hsr.it (R.V.)
- \* Correspondence: alessandro.gori@cnr.it (A.G.); marina.cretich@cnr.it (M.C.)
- † these authors equally contributed.
- ‡ these authors equally contributed.

**Table S1:** number of serum samples for each group (NT, S/D, HT) analyzed by each technique

| Technique                      | Number of analyzed samples per group |
|--------------------------------|--------------------------------------|
| Nanoparticle Tracking Analysis | 16                                   |
| Western Blotting               | 12                                   |
| Atomic Force Microscopy        | 1                                    |
| Microarrays                    | 8                                    |
| ddPCR Analysis                 | 8                                    |

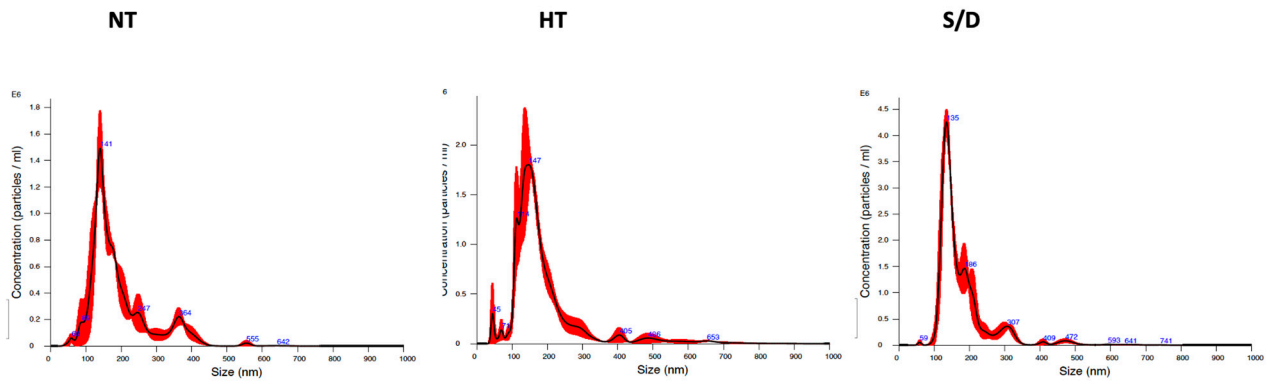

**Figure S1:** representative NTA analysis graph for the non treated (NT), Heat Treated (HT) and solvent/detergent (S/D) treated sample
